# Supplementary material
Source: PubMed Central journal article supplement (PMC5507445)
Supplement: NIHMS874930-supplement-Supplemental_Material.pdf [file NIHMS874930-supplement-Supplemental_Material.pdf]

## **SUPPLEMENTAL MATERIAL – Video Legends**

### **Video 1**

See also Figure 8, Panels A and B. Cine MR images in the 4 chamber apical view of a 29-year-old who presented with acute myocarditis. LVEF was mildly depressed at 52% with subtle mid-anterolateral and very proximal septal wall hypokinesis with otherwise low normal regional wall motion. RV systolic function was normal. The cine findings underestimate the extent of myocardial involvement due to extensive inflammation and necrosis which are evident on the LGE (Figure 8, Panel A) and T2 images (Figure 8, Panel B) and do not follow a typical coronary artery distribution, consistent with a non-ischemic process. The patient died suddenly 2 days following hospital discharge.

### **Video 2**

See also Figure 8, Panel C. Cine MR images in the apical long axis view of a 22-year-old with chronic myocarditis. The cine findings show normal biventricular systolic function with no regional wall motion abnormalities and are not sensitive to the extensive fibrosis seen on the LGE images (Figure 8, Panel C).
